# Supplementary material
Source: Springer Nature journal article supplement (https://www.springermedizin.de/resource/supplementary/13054_2009_8406_MOESM9_ESM.pdf/9731896)

**thrombin (5 min)**

- - + + - -

**thrombin**

- - + +

**thrombin (15min)**

- - - - + +

**APC**

+ - - +

**U0126 (5 $\mu$ M)**

- + - + - +

**pERK**

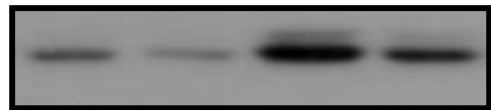

**pERK**

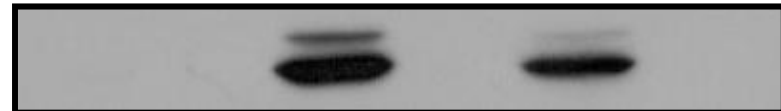

**tERK**

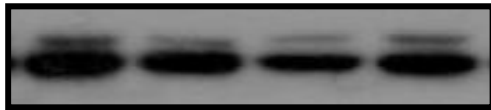

**tERK**

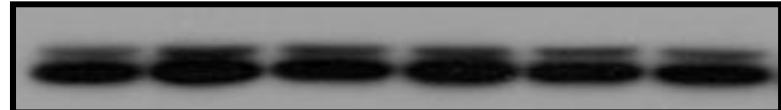

**pcPLA<sub>2</sub>**

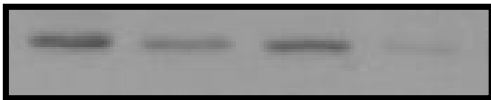

**pcPLA<sub>2</sub>**

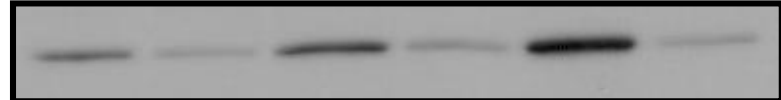

**tcPLA<sub>2</sub>**

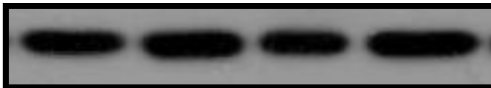

**tcPLA<sub>2</sub>**

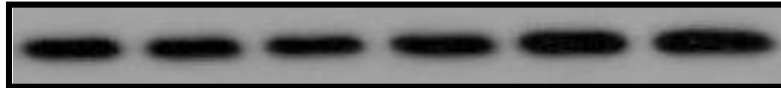

Supplement: MOESM9 [file 9731896]
